# Supplementary material for: Mercury (Hg) in Ryugu particles and implications for the origin of volatile elements in early Earth
Source: Research Square preprint supplement (doi:10.21203/rs.3.rs-4002901/v1), 2024-04-04
Supplement: Supplementary file 1 [file b990b883cde39d377cf99c6a.docx]

Supplementary Table S1. INAA data for geological reference materials (BHVO-2 and BCR-2)a.

| Element | unit | Gamma-ray | BHVO-2 | | | |  | BCR-2 | | | |
| --- | --- | --- | --- | --- | --- | --- | --- | --- | --- | --- | --- |
| energy (keV) | This work | | | Literatureb |  | This work | | | Literatureb |
| Na | [%] | 1368.6 | 1.61 | ± | 0.01 | 1.646 |  | 2.11 | ± | 0.05 | 2.315 |
| Mg | [%] | 1014.4 | 4.25 | ± | 0.33 | 4.376 |  | 2.44 | ± | 0.24 | 2.170 |
| Al | [%] | 1778.9 | 7.07 | ± | 0.33 | 7.113 |  | 6.91 | ± | 0.11 | 7.135 |
| K | [%] | 1524.7 | 0.417 | ± | 0.026 | 0.4259 |  | 1.46 | ± | 0.09 | 1.473 |
| Ca | [%] | 3084.4 | 7.61 | ± | 0.93 | 8.148 |  | 4.42 | ± | 0.78 | 5.084 |
| Sc | [µg g-1] | 889.3 | 31.8 | ± | 0.1 | 31.83 |  | 30.2 | ± | 0.1 | 33.53 |
| Ti | [%] | 320.1 | 1.67 | ± | 0.15 | 1.637 |  | 1.24 | ± | 0.14 | 1.358 |
| V | [µg g-1] | 1434.1 | 311 | ± | 18 | 318.2 |  | 407 | ± | 15 | 417.6 |
| Cr | [µg g-1] | 320.1 | 291 | ± | 2 | 287.2 |  | 15.4 | ± | 0.8 | 15.85 |
| Mn | [%] | 1810.7 | 0.137 | ± | 0.004 | 0.1309 |  | 0.139 | ± | 0.005 | 0.1523 |
| Fe | [%] | 1099.3 | 8.57 | ± | 0.03 | 8.666 |  | 8.94 | ± | 0.03 | 9.631 |
| Co | [µg g-1] | 1332.5 | 43.3 | ± | 0.3 | 44.89 |  | 34.1 | ± | 0.2 | 37.33 |
| Ni | [µg g-1] | 810.8 | 134 | ± | 11 | 119.8 |  |  |  |  | 12.57 |
| Zn | [µg g-1] | 1115.5 | 104 | ± | 6 | 103.9 |  | 124 | ± | 6 | 129.5 |
| Ga | [µg g-1] | 630.0 | 18.6 | ± | 6.4 | 21.37 |  | 17.8 | ± | 5.9 | 22.07 |
| Rb | [µg g-1] | 1076.7 | 10.7 | ± | 3.2 | 9.261 |  | 44.0 | ± | 5.2 | 46.02 |
| Sr | [µg g-1] | 514.0 | 417 | ± | 39 | 394.1 |  | 309 | ± | 29 | 337.4 |
| Cs | [µg g-1] | 795.9 | 0.253 | ± | 0.069 | 0.0996 |  | 1.12 | ± | 0.09 | 1.160 |
| Ba | [µg g-1] | 496.3 | 211 | ± | 39 | 130.9 |  | 640 | ± | 73 | 683.9 |
| La | [µg g-1] | 1596.2 | 15.1 | ± | 0.4 | 15.20 |  | 25.1 | ± | 0.7 | 25.08 |
| Ce | [µg g-1] | 145.4 | 36.7 | ± | 0.6 | 37.53 |  | 51.4 | ± | 0.5 | 53.12 |
| Sm | [µg g-1] | 103.2 | 5.76 | ± | 0.05 | 6.023 |  | 6.91 | ± | 0.41 | 6.547 |
| Eu | [µg g-1] | 1408.0 | 2.02 | ± | 0.07 | 2.043 |  | 1.72 | ± | 0.06 | 1.989 |
| Tb | [µg g-1] | 879.4 | 0.947 | ± | 0.092 | 0.9392 |  | 0.936 | ± | 0.081 | 1.077 |
| Yb | [µg g-1] | 396.3 | 1.83 | ± | 0.12 | 1.994 |  | 3.29 | ± | 0.19 | 3.392 |
| Lu | [µg g-1] | 208.4 | 0.262 | ± | 0.020 | 0.2754 |  | 0.472 | ± | 0.029 | 0.5049 |
| Hf | [µg g-1] | 482.0 | 4.40 | ± | 0.14 | 4.470 |  | 4.63 | ± | 0.14 | 4.972 |
| Ta | [µg g-1] | 1189.0 | 1.18 | ± | 0.07 | 1.154 |  | 0.804 | ± | 0.052 | 0.785 |
| Th | [µg g-1] | 312.0 | 1.30 | ± | 0.10 | 1.224 |  | 5.42 | ± | 0.30 | 5.828 |
| U | [µg g-1] | 277.6 | 0.545 | ± | 0.134 | 0.412 |  | 1.57 | ± | 0.27 | 1.683 |

a Uncertainties cited only include the counting statistics (1s) in gamma-ray counting.

b Jochum et al.9

Supplementary Table S2. INAA data for Allendea.

| Element | unit | Gamma-ray | Allende | | | | | | | | |
| --- | --- | --- | --- | --- | --- | --- | --- | --- | --- | --- | --- |
| energy (keV) | This work | | | Literatureb | | | | | |
| (I) | (II) | (III) | (IV) | （V) | (VI) |
| Na | [%] | 1368.6 | 0.343 | ± | 0.001 | 0.34 | 0.329 | 0.33 |  |  |  |
| Mg | [%] | 1014.4 | 14.2 | ± | 0.6 | 14.83 | 14.8 | 14.85 |  | 14.94 |  |
| Al | [%] | 1778.9 | 1.79 | ± | 0.16 | 1.74 | 1.76 | 1.73 |  | 1.72 |  |
| Cl | [µg g-1] | 2167.7 | 317 | ± | 108 |  |  |  | 320 |  |  |
| K | [%] | 1524.7 | 0.0303 | ± | 0.0029 | 0.03 | 0.0295 | 0.02 |  |  | 0.0277 |
| Ca | [%] | 3084.4 | 1.58 | ± | 0.24 | 1.84 | 1.86 | 1.87 |  | 1.87 |  |
| Sc | [µg g-1] | 889.3 | 11.3 | ± | 0.0 | 11 | 11.3 |  |  |  | 11.28 |
| Ti | [%] | 320.1 | 0.0777 | ± | 0.0293 | 0.090 |  | 0.090 |  | 0.0900 | 0.0878 |
| V | [µg g-1] | 1434.1 | 96.6 | ± | 9.8 | 92 | 99 |  |  | 93 | 95.2 |
| Cr | [µg g-1] | 320.1 | 3650 | ± | 30 | 3600 | 3640 | 3600 |  | 3,490 |  |
| Mn | [%] | 1810.7 | 0.158 | ± | 0.004 | 0.15 | 0.145 | 0.14 |  | 0.146 | 0.142 |
| Fe | [%] | 1099.3 | 23.9 | ± | 0.1 | 23.57 | 23.7 | 23.85 |  | 23.60 |  |
| Co | [µg g-1] | 1332.5 | 646 | ± | 3 | 600 | 662 |  |  |  | 616 |
| Ni | [µg g-1] | 810.8 | 13500 | ± | 100 | 14200 | 13500 |  |  | 11,700 |  |
| Zn | [µg g-1] | 1115.5 | 115 | ± | 14 | 110 | 117 |  |  |  | 119 |
| Ga | [µg g-1] | 630.0 | 4.85 | ± | 0.92 | 6 | 6.0 |  |  |  | 5.68 |
| As | [µg g-1] | 559.1 | 1.72 | ± | 0.10 |  | 1.57 |  |  |  |  |
| Se | [µg g-1] | 264.7 | 7.38 | ± | 0.47 |  | 8.19 |  |  |  |  |
| Br | [µg g-1] | 776.5 | 1.47 | ± | 0.36 |  | 1.57 |  |  |  |  |
| Ru | [µg g-1] | 497.1 | 1,190 | ± | 300 |  | 1150 |  |  |  |  |
| La | [µg g-1] | 1596.2 | 0.475 | ± | 0.078 | 0.52 | 0.495 |  |  |  | 0.516 |
| Sm | [µg g-1] | 103.2 | 0.307 | ± | 0.012 | 0.34 | 0.302 |  |  |  | 0.329 |
| Eu | [µg g-1] | 1408.0 | 0.108 | ± | 0.016 | 0.11 | 0.114 |  |  |  | 0.114 |
| Yb | [µg g-1] | 396.3 | 0.316 | ± | 0.052 | 0.30 | 0.326 |  |  |  | 0.325 |
| Lu | [µg g-1] | 208.4 | 0.0441 | ± | 0.0097 | 0.052 | 0.047 |  |  |  | 0.0459 |
| Os | [µg g-1] | 129.4 | 935 | ± | 151 |  | 832 |  |  |  |  |
| Ir | [µg g-1] | 468.1 | 793 | ± | 7 |  | 788 |  |  |  |  |
| Au | [µg g-1] | 411.8 | 145 | ± | 5 | 150 | 145 |  |  |  |  |

a Uncertainties cited only include the counting statistics (1s) in gamma-ray counting.

b (I) Jarosewich et al.3 (II) Kallemeyn and Wasson2, Kallemeyn et al.4 (III) Jarosewich5 (IV) Kato et al.6 (V) Wolf and Palme7 (VI) Barrat et al.8

Supplementary Table S3. INAA data for Murchisona.

| Element | unit | Gamma-ray | Murchison | | | | | | | |
| --- | --- | --- | --- | --- | --- | --- | --- | --- | --- | --- |
| energy (keV) | This work | | | Literatureb | | | | |
| (I) | (II) | (III) | (IV) | (V) |
| Na | [%] | 1368.6 | 0.479 | ± | 0.001 | 0.259 | 0.275, 0.427 | 0.18 |  | 0.478 |
| Mg | [%] | 1014.4 | 12.6 | ± | 0.5 | 11.80 | 12.60 | 12.02 | 12.14 | 11.3 |
| Al | [%] | 1778.9 | 1.26 | ± | 0.04 |  | 1.25, 1.30 | 1.14 | 1.16 | 1.19 |
| Cl | [µg g-1] | 2167.7 | 395 | ± | 99 |  |  |  |  | 274 |
| K | [%] | 1524.7 | 0.0422 | ± | 0.0041 | 0.0371 | 0.0372, 0.0437 | 0.03 |  | 0.05 |
| Ca | [%] | 3084.4 | 1.23 | ± | 0.35 |  | 1.40, 1.50 | 1.35 | 1.28 | 1.27 |
| Sc | [µg g-1] | 889.3 | 8.20 | ± | 0.02 |  | 7.55, 8.38 |  |  | 8.08 |
| Ti | [%] | 320.1 | 0.0883 | ± | 0.0359 |  |  | 0.078 | 0.065 | 0.0525 |
| V | [µg g-1] | 1434.1 | 74.7 | ± | 4.7 |  | 77, 82 |  | 81 | 74.0 |
| Cr | [µg g-1] | 320.1 | 3,160 | ± | 30 |  | 2,920, 3,250 |  | 3,070 | 2980 |
| Mn | [%] | 1810.7 | 0.176 | ± | 0.005 |  | 0.175, 0.177 | 0.15 | 0.172 | 0.164 |
| Fe | [%] | 1099.3 | 20.8 | ± | 0.1 | 21.02 | 19.8, 22.0 | 22.13 | 21.40 | 20.9 |
| Co | [µg g-1] | 1332.5 | 553 | ± | 2 |  | 550, 623 |  |  | 573 |
| Ni | [µg g-1] | 810.8 | 11,600 | ± | 100 |  | 11,700, 12,300 |  | 12,600 | 11900 |
| Zn | [µg g-1] | 1115.5 | 160 | ± | 4 |  | 184, 194 |  |  | 167 |
| Ga | [µg g-1] | 630.0 | 8.78 | ± | 1.12 |  | 7.9, 8,2 |  |  | 7.93 |
| As | [µg g-1] | 559.1 | 1.73 | ± | 0.14 |  | 1.77, 1.84 |  |  | 1.46 |
| Se | [µg g-1] | 264.7 | 12.5 | ± | 0.7 |  | 12.6, 13.8 |  |  | 14.4 |
| Br | [µg g-1] | 776.5 | 2.01 | ± | 0.62 |  | 2.6, 4.6 |  |  | 2.32 |
| Ru | [µg g-1] | 497.1 | 1,160 | ± | 310 |  | 970, 1030 |  |  | <600 |
| La | [µg g-1] | 1596.2 | 0.324 | ± | 0.074 | 0.322 | 0.311, 0.316 |  |  | 0.323 |
| Sm | [µg g-1] | 103.2 | 0.200 | ± | 0.012 | 0.211 | 0.200, 0.204 |  |  | 0.201 |
| Eu | [µg g-1] | 1408.0 | 0.0823 | ± | 0.0212 | 0.0801 | 0.076, 0.086 |  |  | 0.0711 |
| Yb | [µg g-1] | 396.3 | 0.236 | ± | 0.060 | 0.228 | 0.204, 0.258 |  |  | 0.243 |
| Lu | [µg g-1] | 208.4 | 0.0414 | ± | 0.0079 | 0.0361 | 0.033, 0.035 |  |  | 0.03790 |
| Os | [µg g-1] | 129.4 | 525 | ± | 121 |  | 670, 690 |  |  | 716 |
| Ir | [µg g-1] | 468.1 | 596 | ± | 7 |  | 567, 698 |  |  | 491 |
| Au | [µg g-1] | 411.8 | 160 | ± | 1 |  | 153, 163 |  |  | 163 |
| Hg | [µg g-1] | 279.2 | 1.42 | ± | 0.30 |  |  |  |  |  |

a Uncertainties cited only include the counting statistics (1s) in gamma-ray counting.

b (I) Nakamura1 (II) Kallemeyn and Wasson2, Kallemeyn et al.4 (III) Jarosewich5 (IV) Wolf and Palme7 (V) Shirai et al.10
